# Supplementary material for: In situ microwave heating fabrication of copper nanoparticles inside cotton fiber using pressurization in immiscible liquids with raw material solutions
Source: Royal Society of Chemistry journal article supplement (doi:10.1039/d1ra04868f), 2021-01-01
Supplement: d1ra04868f1.pdf [file d1ra04868f1.pdf]

## Supporting information

### **In-situ microwave heating fabrication of copper nanoparticles inside cotton fiber using pressurization in immiscible liquids with raw material solutions**

Masato Miyakawa, Chizuru Shigaraki, Takashi Nakamura  
and Masateru Nishioka \*

*National Institute of Advanced Industrial Science and Technology, AIST,  
4-2-1, Nigatake, Miyagino-ku, Sendai, 983-8551, Japan*

*E-mail: m-nishioka@aist.go.jp*

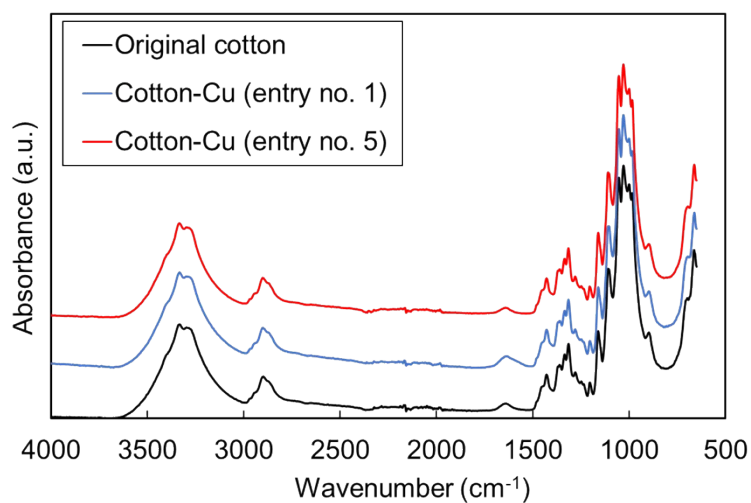

**Figure S1.** ATR-FTIR spectra of the fabricated cotton fibers.

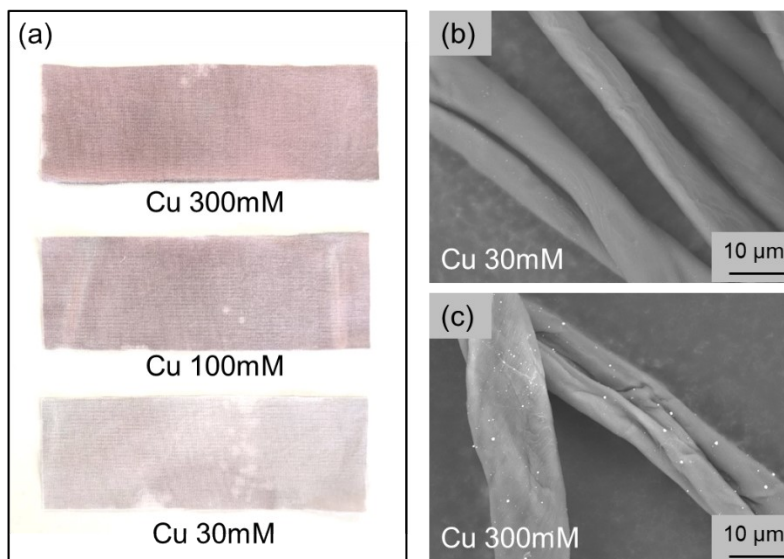

**Figure S2.** (a) Appearance photograph and (b, c) SEM images of the cotton fibers fabricated using  $\text{Cu}(\text{C}_5\text{H}_{11}\text{COO})_2$  hydrophobic solutions with different copper concentrations (entry nos. 6–8).

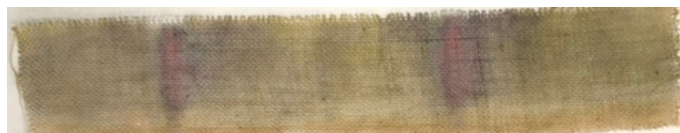

**Figure S3.** Appearance photograph of the cotton fiber fabricated using  $\text{Cu}(\text{CH}_3\text{COO})_2$  hydrophilic solution. Fabricated temperature by MW was  $200\text{ }^\circ\text{C}$  (entry no. 9).

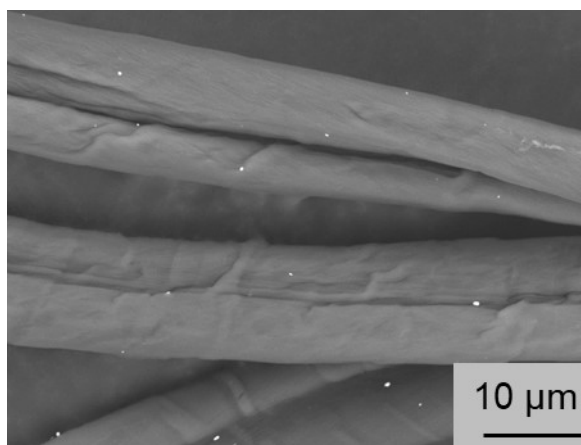

**Figure S4.** SEM image of the fabricated cotton fiber after 240 min washing test (entry no. 5).
